# Supplementary material for: Protective immune barrier against hepatitis B is needed in individuals born before infant HBV vaccination program in China
Source: PubMed Central journal article supplement (PMC4677310; doi:10.1038/srep18334), 2015-12-14

---

## Supplementary Materials

---

**Title:** Protective immune barrier against hepatitis B is needed in individuals born before infant HBV vaccination program in China

**Authors:** Shigui Yang<sup>1</sup>, Chengbo Yu<sup>1</sup>, Ping Chen<sup>1</sup>, Min Deng<sup>1</sup>, Qing Cao<sup>1</sup>, Yiping Li<sup>2</sup>, Jingjing Ren<sup>1</sup>, Kaijin Xu<sup>1</sup>, Jun Yao<sup>3</sup>, Tiansheng Xie<sup>1</sup>, Chencheng Wang<sup>1</sup>, Yuanxia Cui<sup>1</sup>, Cheng Ding<sup>1</sup>, Guo Tian<sup>1</sup>, Bing Wang<sup>1</sup>, Xiaoyan Zhang<sup>1</sup>, Bing Ruan<sup>1\*</sup>, Lanjuan Li<sup>1\*</sup>

<sup>1</sup> State Key Laboratory for Diagnosis and Treatment of Infectious Diseases, Collaborative Innovation Center for Diagnosis and Treatment of Infectious Diseases, The First Affiliated Hospital, College of Medicine, Zhejiang University, Hangzhou310003, China

<sup>2</sup>Zhejiang Institute of Medical-care Information Technology, Hangzhou 311112, China

<sup>3</sup>Zhejiang Provincial Center for Disease Control and Prevention, Hangzhou 310051, China

**Correspondence author:** Prof. Lanjuan Li, MD. and Bing Ruan

**Email:** ljli@zju.edu.cn and hzruanbing@163.com

Supplementary Table 1: Incidence and hazard ratios of factors associated with birth before infant  
 HBV vaccination program implementation in 1992

| Item                                         | Birth after 1992  | Birth before 1992 |
|----------------------------------------------|-------------------|-------------------|
| Population size                              | 7425              | 310536            |
| The number of new infections                 | 32                | 5369              |
| Mean follow-up period (years)                | 15582.12          | 610976.53         |
| The total number of follow-up person-years   | 32                | 5369              |
| The incidence rate (95% CI)*                 | 0.21 (0.10-0.31)  | 0.88 (0.85-0.91)  |
| Hazard ratio (HR, 95% CI)                    | 4.96 (3.50-7.01)  |                   |
| Hazard ratio (HR) adjusted by gender and age | 8.04 (5.60-11.53) |                   |

\* per 100 person-years

Supplementary Table 2: Selection of variables in the cloud-based data system

| Field Name                      | Field Code             | Data Format         | Fill Mode | Range                                                                                                                                                                 |
|---------------------------------|------------------------|---------------------|-----------|-----------------------------------------------------------------------------------------------------------------------------------------------------------------------|
| Citizen ID                      | ID_CARD_NO             | VARCHAR2 (100 CHAR) | Required  | The standard citizen ID number                                                                                                                                        |
| Date of Check-up                | DATE_CHECKUP           | TIMESTAMP(6)        | Required  |                                                                                                                                                                       |
| Gender                          | GENDER                 | NUMBER(10)          | Required  | 0: Unknown Gender; 1: Males; 2: Females; 9: Unknown                                                                                                                   |
| Date of birth                   | DATE_BIRTHDAY          | TIMESTAMP(6)        | Required  |                                                                                                                                                                       |
| Nation                          | NATIONALITY            | NUMBER(10)          | Option    | Reference: the GBT 3304-1991 national digital code                                                                                                                    |
| Administrative division code    | AREA_CODE              | NUMBER(19)          | Required  | Reference to residential address                                                                                                                                      |
| Occupation                      | CAREER                 | NUMBER(10)          | Option    | 1.Officer; 2.Professional and technical personnel; 3.Worker; 4.Business and service personnel; 5.Farmer; 6.Transport-related workers; 7.Soldier; 8.Other;             |
| Education                       | EDUCATION_LEVEL        | NUMBER(10)          | Option    | 1: Illiterate and semi-literate; 2. Primary school; 3. Junior high school; 4. High school /technical school / college; 5. University degree or above; 6. Unknown      |
| Marital status                  | MARITAL_STATUS         | NUMBER(10)          | Option    | 1. Unmarried; 2. Married; 3. Widowed; 4. Divorced; 5. Unspecified marital status.                                                                                     |
| Out 3 months or more per year   | GO_OUT3MONTHS_PER_YEAR | NUMBER(10)          | Required  | 1: No, 2: Yes, 3: Unknown                                                                                                                                             |
| Smoking habits                  | SMOKING_HABIT          | NUMBER(10)          | Option    | 1. Never smoked; 2: Quit smoking; 3. Smoking.                                                                                                                         |
| Drinking frequency              | DRINKING_FREQUENCY     | NUMBER(10)          | Option    | 1. Never; 2. Occasionally; 3. More than once a week; 4. Every day.                                                                                                    |
| Exercise frequency              | EXERCISE_FREQUENCY     | NUMBER(10)          | Option    | 1. Every day; 2. More than once a week; 3. Occasionally; 4. Never.                                                                                                    |
| Hepatitis B vaccination history | HB_VACCINATION         | NUMBER(10)          | Required  | 1: No, 2: Yes, 3: Unknown                                                                                                                                             |
| Blood type                      | BLOOD_TYPE             | NUMBER(10)          | Option    | 1 : Type A , 2: Type B, 3: Type O, 4: Type AB                                                                                                                         |
| Genetic history                 | HAVING_GENETIC_DISEASE | NUMBER(10)          | Option    | 1: No, 2: Yes, 3: Unknown                                                                                                                                             |
| History of drug allergy         | HISTORY_OF_ALLERGY_O   | VARCHAR2 (100 CHAR) | Option    | Can be selected: 1. Without; 2. Penicillin; 3. Sulfonamide; 4. Streptomycin; 5. Other. The comma separator was used to report multiple values, for example: 1,2,3,4,5 |
| History of trauma               | HISTORY_OF_TRAUMA      | NUMBER(10)          | Option    | 1: No, 2: Yes, 3: Unknown                                                                                                                                             |
| Surgery                         | HISTORY_OF_SURGERY     | NUMBER(10)          | Required  | 1: No, 2: Yes, 3: Unknown                                                                                                                                             |

|                                              |                                |                     |          |                                                                                                                                                                                                                                                                                                                                                                |
|----------------------------------------------|--------------------------------|---------------------|----------|----------------------------------------------------------------------------------------------------------------------------------------------------------------------------------------------------------------------------------------------------------------------------------------------------------------------------------------------------------------|
| History of blood transfusion                 | HISTORY_OF_TRANSFUSION         | NUMBER(10)          | Required | 1: No, 2: Yes, 3: Unknown                                                                                                                                                                                                                                                                                                                                      |
| Past history of AIDS                         | HISTORY_OF_AIDS                | NUMBER(10)          | Required | 1: No, 2: Yes, 3: Unknown                                                                                                                                                                                                                                                                                                                                      |
| Past history of hepatitis B                  | HISTORY_OF_HB                  | NUMBER(10)          | Required | 1: No, 2: Yes, 3: Unknown                                                                                                                                                                                                                                                                                                                                      |
| Past history of TB                           | HISTORY_OF_TB                  | NUMBER(10)          | Required | 1: No, 2: Yes, 3: Unknown                                                                                                                                                                                                                                                                                                                                      |
| Family history of hepatitis B                | FAMILY_HISTORY_OF_HB           | NUMBER(10)          | Required | 1: No, 2: Yes, 3: Unknown                                                                                                                                                                                                                                                                                                                                      |
| Family history of hepatitis B - Father       | FATHER_HISTORY_OF_DISEASES_O   | VARCHAR2 (100 CHAR) | Required | Can be selected: 1. Without; 2. Hypertension; 3. Diabetes; 4. Coronary heart disease; 5. Chronic obstructive pulmonary disease; 6. Malignant tumor; 7. Stroke; 8:Severe mental illness; 9:Tuberculosis; 10:Hepatitis B; 11. Congenital malformation; 12. AIDS; 13. Other. The comma separator was used to report multiple values, for example: 1,2,3,4, and 5. |
| Family history of hepatitis B - mother       | MOTHER_HISTORY_OF_DISEASES_O   | VARCHAR2 (100 CHAR) | Required | Can be selected: 1. Without; 2. Hypertension; 3. Diabetes; 4. Coronary heart disease; 5. Chronic obstructive pulmonary disease; 6. Malignant tumor; 7. Stroke; 8:Severe mental illness; 9:Tuberculosis; 10:Hepatitis B; 11. Congenital malformation; 12. AIDS; 13. Other. The comma separator was used to report multiple values, for example: 1,2,3,4, and 5. |
| Family history of hepatitis B - siblings     | SIBLINGS_HISTORY_OF_DISEASES_O | VARCHAR2 (100 CHAR) | Required | Can be selected: 1. Without; 2. Hypertension; 3. Diabetes; 4. Coronary heart disease; 5. Chronic obstructive pulmonary disease; 6. Malignant tumor; 7. Stroke; 8:Severe mental illness; 9:Tuberculosis; 10:Hepatitis B; 11. Congenital malformation; 12. AIDS; 13. Other. The comma separator was used to report multiple values, for example: 1,2,3,4, and 5. |
| Family history - children                    | CHILDREN_HISTORY_OF_DISEASES_O | VARCHAR2 (100 CHAR) | Required | Can be selected: 1. Without; 2. Hypertension; 3. Diabetes; 4. Coronary heart disease; 5. Chronic obstructive pulmonary disease; 6. Malignant tumor; 7. Stroke; 8:Severe mental illness; 9:Tuberculosis; 10:Hepatitis B; 11. Congenital malformation; 12. AIDS; 13. Other. The comma separator was used to report multiple values, for example: 1,2,3,4, and 5. |
| Hepatitis B surface antibody                 | HBSAB                          | NUMBER(10)          | Required | 1: Negative; 2: Positive; 3: Unknown.                                                                                                                                                                                                                                                                                                                          |
| Hepatitis B surface antigen                  | HBSAG                          | NUMBER(10)          | Required | 1: Negative; 2: Positive; 3: Unknown.                                                                                                                                                                                                                                                                                                                          |
| Check whether serum alanine aminotransferase | HAVING_SGPT_TEST               | NUMBER(10)          | Option   | Numerical results of laboratory studies, u/l unit                                                                                                                                                                                                                                                                                                              |

Supplementary figure 1: The HBsAg prevalence rate in individuals born in different eras varied with gender and residence. Panel a: The HBsAg prevalence rate before and after HB vaccination of infants since 1992 (Gender); Panel b: The HBsAg prevalence rate before and after HB vaccination of infants since 1992 (Area); Panel c: The relationship between birth era and HBsAg prevalence rate; Panel d: The relationship between birth era and susceptibility to hepatitis B.

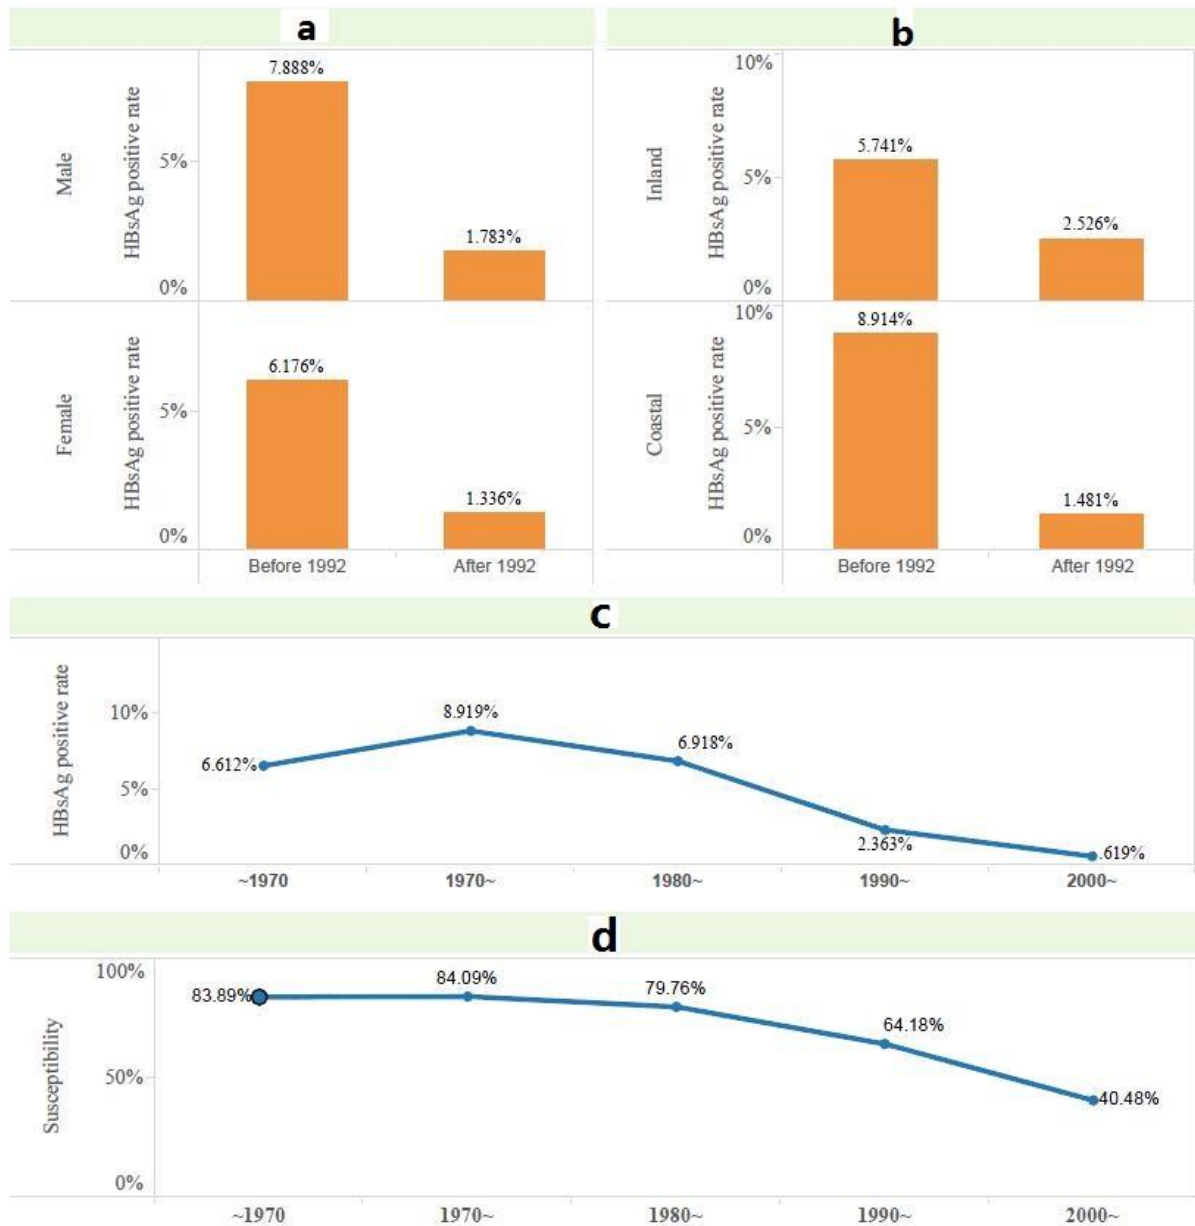

Supplement: srep18334-s1.pdf [file srep18334-s1.pdf]
